# Supplementary material for: A two-dimensional heterogeneous structured Ni3Se2@MoO3 catalyst for seawater electrolysis
Source: Royal Society of Chemistry journal article supplement (doi:10.1039/d3ta01585h), 2023-01-01
Supplement: d3ta01585h1.pdf [file d3ta01585h1.pdf]

## ***Supporting Information for***

### **Two-dimensional Heterogeneous Structured Ni<sub>3</sub>Se<sub>2</sub>@MoO<sub>3</sub> Catalyst for Seawater Electrolysis**

Suyang Feng<sup>a,b</sup>, Chengshan Gu<sup>a</sup>, Yanhui Yu<sup>a</sup>, Peng Rao<sup>a</sup>, Peilin Deng<sup>a,\*</sup>, Jing Li<sup>a</sup>, Zhenye Kang, Xinlong  
Tian<sup>a,\*</sup>, Zhifu Wu<sup>b,\*</sup>

*<sup>a</sup>State Key Laboratory of Marine Resource Utilization in the South China Sea, Hainan Provincial Key  
Lab of Fine Chemistry, School of Chemical Engineering and Technology, Hainan University, Haikou 570228,  
Hainan, China*

*<sup>b</sup>School of Pharmacy, Guilin Medical University, Guilin, Guangxi, 541199, China*

**\*Corresponding author:** *dengpeilin@hainanu.edu.cn (P. Deng); tianxl@hainanu.edu.cn (X. Tian);  
112019071@glmc.edu.cn (Z. Wu)*

## 1. Experimental

### 1.1 Materials

All chemicals were analytical grade, including, and potassium hydroxide (KOH, 85%),  $\text{NiCl}_2 \cdot 6\text{H}_2\text{O}$  (AR, 99%),  $\text{SeO}_2$  (AR, 99%),  $\text{C}_6\text{H}_8\text{O}_7 \cdot \text{H}_2\text{O}$  (AR, 98.5%), and  $(\text{NH}_4)_6\text{Mo}_7\text{O}_{24} \cdot 4\text{H}_2\text{O}$  (AR, 98%) were used in the experiments. The commercial porous copper foam (CF) (Type: PPI, 1 cm  $\times$  2 cm, 1 mm thickness, and purity >99.99%) All test solution was prepared with distilled water purified.

The CF was ultrasonically cleaned in 3.0 mol hydrochloric (HCl) for 10 min to remove the copper oxides layer on the surface, ultrasonically cleaned in absolute ethanol ( $\text{C}_2\text{H}_6\text{O}$ ) for 10 min to remove the oil stain layer, and deionized (DI) water rinsing and finally vacuum drying.

### 1.2 Preparation of $\text{Ni}_3\text{Se}_2 @ \text{MoO}_3 / \text{CF}$ Catalyst

$\text{Ni}_3\text{Se}_2 @ \text{MoO}_3 / \text{CF}$ ,  $\text{Ni}_3\text{Se}_2 / \text{CF}$ , and  $\text{MoO}_3 / \text{CF}$  were synthesized by a fast one-step electrodeposition process, which was a standard three-electrode system in the CHI660D electrochemical workstation. The solvent was synthesized by ethaline ethylene glycol (EG), choline chloride (ChCl, 99 %) (EG and ChCl at a molar ratio of 2:1), 300 mmol  $\text{L}^{-1}$   $\text{NiCl}_2 \cdot 6\text{H}_2\text{O}$ , 200 mmol  $\text{L}^{-1}$   $(\text{NH}_4)_6\text{Mo}_7\text{O}_{24} \cdot 4\text{H}_2\text{O}$ , 200 mmol  $\text{L}^{-1}$   $\text{C}_6\text{H}_8\text{O}_7 \cdot \text{H}_2\text{O}$ , and 200 mmol  $\text{L}^{-1}$   $\text{SeO}_2$ , followed by stirring at 343 K for eight hours until a balanced mixture was obtained.

CF was used as the working electrode, a silver wire was the reference electrode, and a platinum column was the counter electrode. At 343 K, the voltage at constant potential was  $-0.85$  V. The deposition time was approximately 1000 s, and the charge amount was  $10 \text{ C cm}^{-2}$ .

### 1.3 Preparation of Pt/C and $\text{RuO}_2$ catalyst

Synthesis of Pt/C electrode: Prepare the catalyst solution and mix 5 mg of Pt/C catalyst uniformly into the ethanol (0.990 mL) and Nafion solution (0.010 mL) mixture, the mixed solution was sonicated for two hours to obtain a homogeneous catalyst ink. Then 100  $\mu\text{L}$  of the catalyst ink was loaded onto a 2 cm  $\times$  1 cm CF.

Synthesis of  $\text{RuO}_2$  electrode: Prepare the catalyst solution and mix 5 mg of  $\text{RuO}_2$  catalyst uniformly into the ethanol (0.990 mL) and Nafion solution (0.010 mL) mixture, the mixed solution was sonicated for two hours to obtain a homogeneous catalyst ink. Then 100  $\mu\text{L}$  of the catalyst ink was loaded onto a 2 cm  $\times$  1 cm CF.

## 1.4 Structural and Microstructure Characterization

The phase structures of Ni<sub>3</sub>Se<sub>2</sub>@MoO<sub>3</sub> was probed by powder X-ray diffraction (XRD) patterns recorded on a Rigaku D/Max-2200 diffractometer with Cu K $\alpha$  radiation ( $\lambda = 1.5418 \text{ \AA}$ ). They detected X-ray Photoelectron Spectroscopy (XPS) analysis on a PHI5000 Versaprobe-II. Scanning Electron Microscope (SEM) also measured the microstructures and chemical compositions of Ni<sub>3</sub>Se<sub>2</sub>@MoO<sub>3</sub> deposits recorded on an FEI Nova, Nano SEM 450 equipped with an Energy Dispersive Spectrometer (EDS) system. Transmission Electron Microscope (TEM) measurements were carried out using the JEM-2100 instrument. Gas products from the decoupled water electrolytic cell during OER and HER were respectively analyzed using a GC-2014 (Shimadzu). The variation of ClO<sup>-</sup> concentration during exposure was monitored at 430 nm wavelength by UV-Vis spectrophotometer (MAPADA UV-1100). Raman instrument type: WITec alpha 300R, Germany; laser: 532 nm. Raman instrument type: WITec alpha 300R, Germany; laser: 532 nm.

## 1.5 Electrochemical measurements

The seawater was collected from the local coast in Sanya city, pH  $\approx$  8.7 (Fig. S1). The prepared catalytic materials were used as working electrodes in an electrochemical workstation recorded on Autolab three-electrode system). The counter electrode was a graphite rod electrode, while Hg/HgO electrode served as a reference electrode. The reference electrode is corrected as in Fig. S2. Potential correction CV curve of Hg/HgO electrode under 1.0 M KOH, E (RHE) = E (Hg/HgO) + 0.896 V. Potential correction CV curve of Hg/HgO electrode under 1.0 M KOH + 0.5 M NaCl, E (RHE) = E (Hg/HgO) + 0.840 V. Potential correction CV curve of Hg/HgO electrode under 1.0 M KOH + seawater, E (RHE) = E (Hg/HgO) + 0.852 V.

To evaluate the activity of each electrocatalyst, linear sweep voltammetry (LSV) at a scan rate of 5 mV s<sup>-1</sup>, and the linear portion of the Tafel polarization curve was fitted according to the following Tafel Eq. (2):<sup>1</sup>

$$\eta = a + b \log |j| \quad (1)$$

where  $\eta$  is the overpotential,  $b$  is the Tafel slope, and  $j$  indicates the current density.

Through CV, electric double layer curves were obtained from open circuit potential (OCP)  $\pm$  0.05 V. The corresponding current density was estimated using Eq. (3):<sup>2</sup>

$$j = 1/2 (j_a + j_c) \quad (2)$$

The  $j$  parameter and the scan rate linear slope were used to calculate electrochemical double-layer capacitance,  $C_{dl}$ .

The electrochemical impedance spectra (EIS) were recorded at an overpotential of 10 mA cm<sup>-2</sup> in the frequency range from 10<sup>-1</sup> to 10<sup>5</sup> Hz.<sup>3</sup> For testing stability with ISTEP Multi-Current Steps, the current densities were successively raised from 20 to 100 mA cm<sup>-2</sup> with 20 mA cm<sup>-2</sup> per 1 h for OER and HER. Long-term stability of catalyst was tested through the chronoamperometric curve.

The Faradaic efficiency was calculated by comparing the experimentally produced gas volume with the theoretically calculated one:<sup>4</sup>

$$\text{FE}\% = V_{\text{Experimental}} / V_{\text{Theoretical}} \quad (3)$$

The experiment volume of H<sub>2</sub> was measured by drainage. The theoretical volume can be calculated using the formula:

$$V_{\text{Theoretical}} = I \cdot t \cdot V_m / n \cdot F \quad (4)$$

Where  $I$  is the electrolysis current,  $t$  is the electrolysis time,  $V_m$  is molar volume of H<sub>2</sub> of gas (24.5 L mol<sup>-1</sup>, 298 K, 101 kPa),  $n$  is the number of electrons required for one molecule of H<sub>2</sub> and  $F$  is the Faraday's constant (96485 Cmol<sup>-1</sup>).

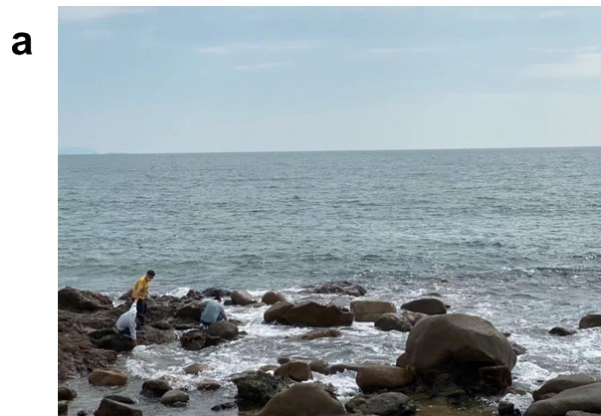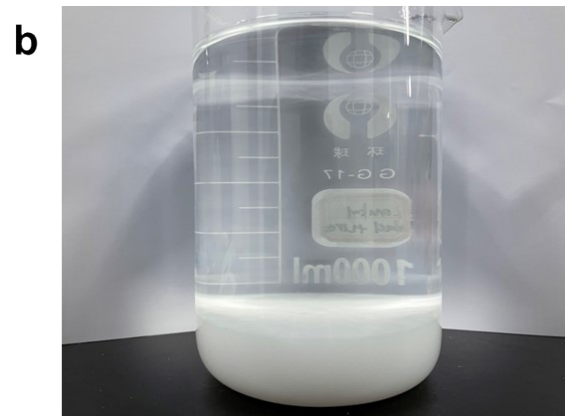

**Fig. S1.** (a) The photo is taken in Yazhou bay of Sanya, China. (b) Photograph of the alkaline seawater electrolyte.

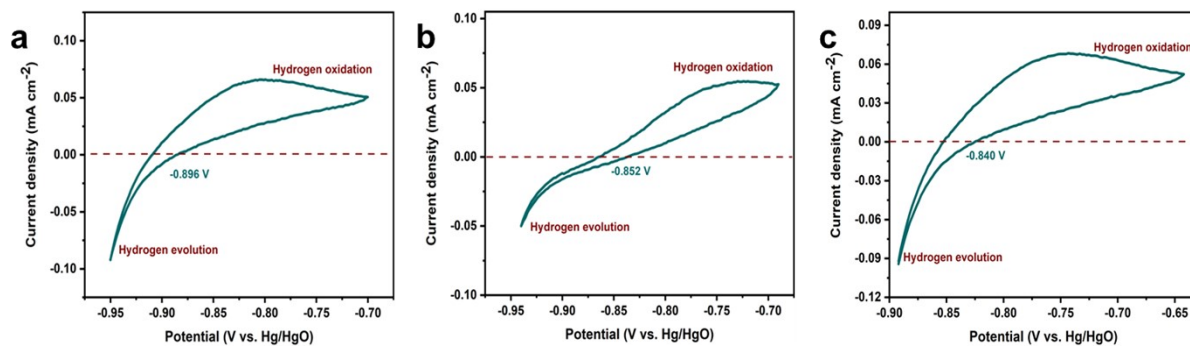

**Fig. S2.** (a-c) Potential correction CV curve of Hg/HgO electrode under 1.0 M KOH, 1.0 M KOH + seawater, and 1.0 M KOH + 0.5 M NaCl.

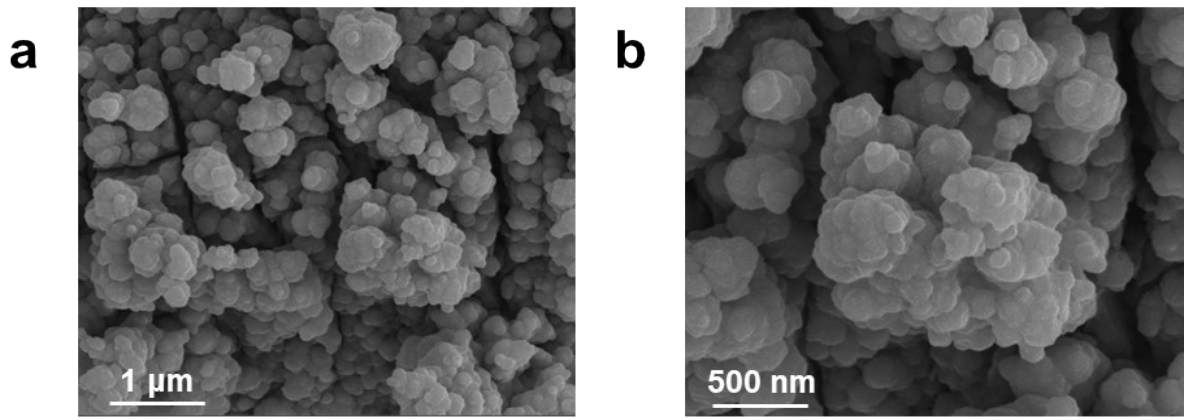

**Fig. S3.** (a, b) The SEM image of  $\text{Ni}_3\text{Se}_2@\text{MoO}_3/\text{CF}$ .

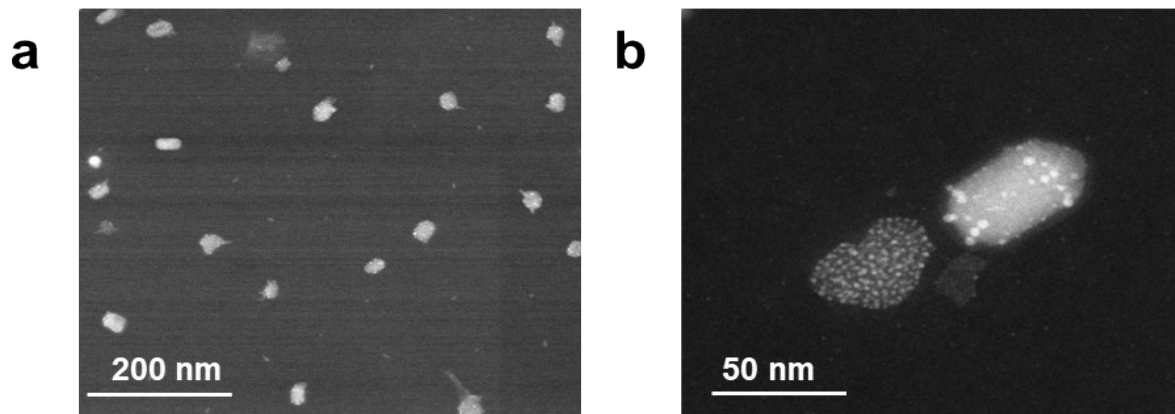

**Fig. S4.** (a, b) The TEM image of  $\text{Ni}_3\text{Se}_2@\text{MoO}_3$ .



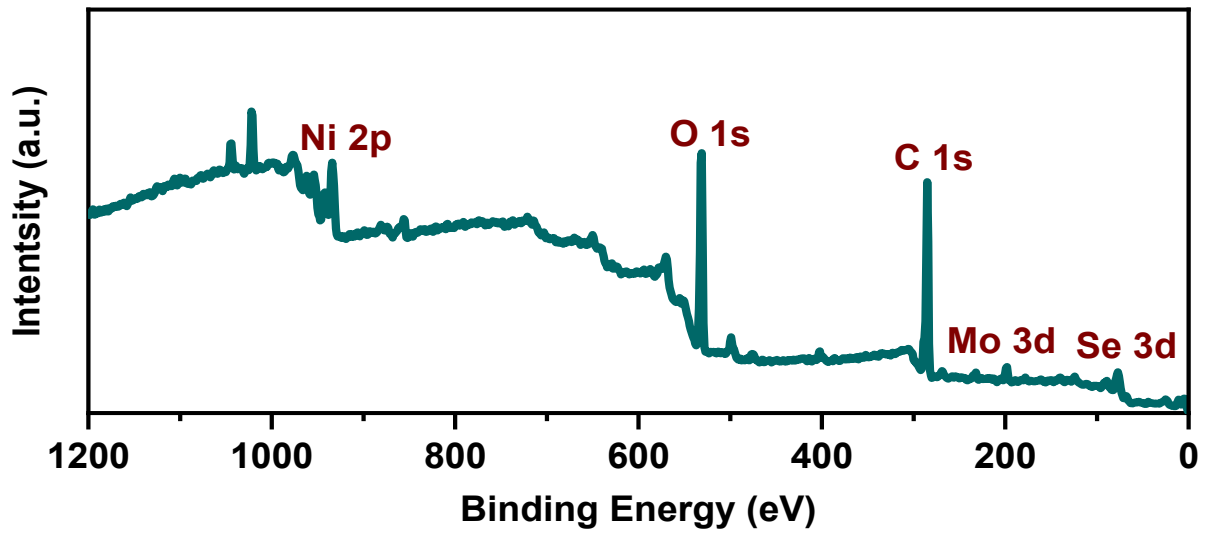

**Fig. S5.** XPS survey spectra of initial  $\text{Ni}_3\text{Se}_2@\text{MoO}_3/\text{CF}$ .

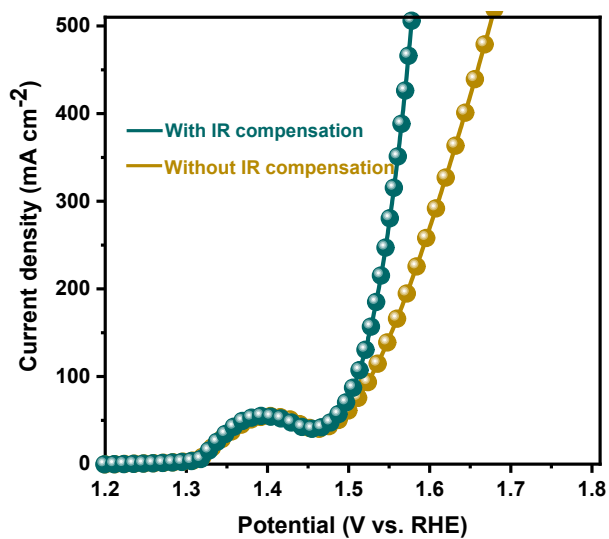

**Fig. S6.** Activity comparison between with iR and without iR compensation. Electrolyte: 1.0 M KOH + Seawater (resistance:  $\sim 0.5 \Omega$ ); temperature: 25 °C. The catalytic activity of different catalysts in consistent- nation the LSV with 85% IR compensation.

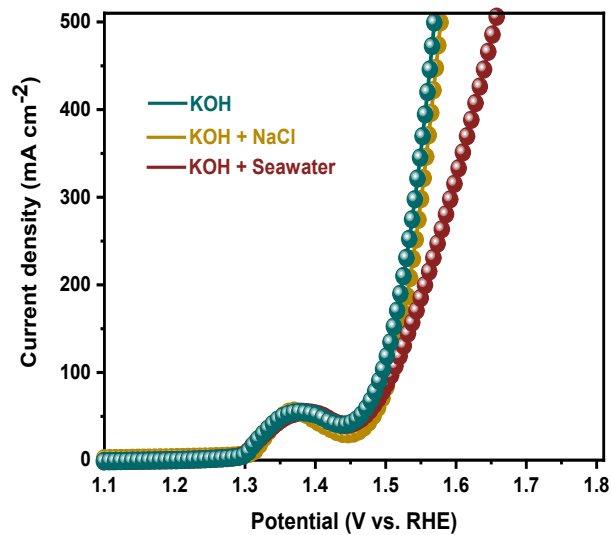

**Fig. S7.** Comparison of the activity of Ni<sub>3</sub>Se<sub>2</sub>@MoO<sub>3</sub>/CF in different electrolytes.

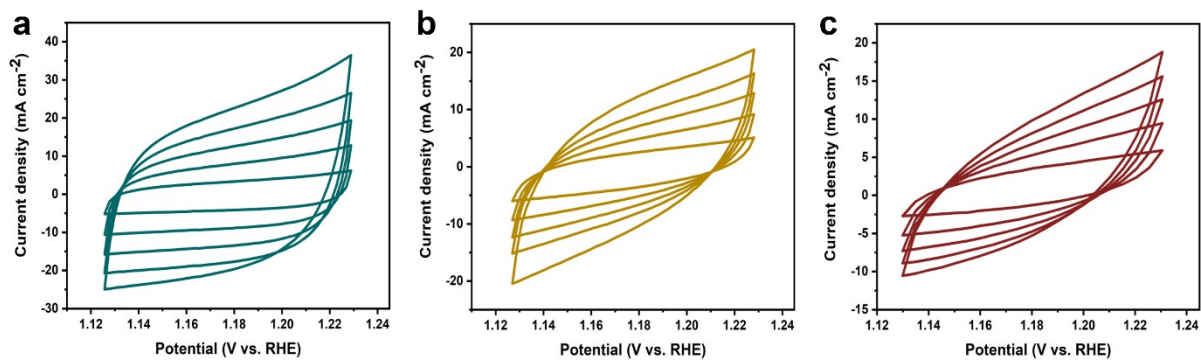

**Fig. S8.** (a-c) CVs recorded in a non-faraday region of different catalysts for OER.

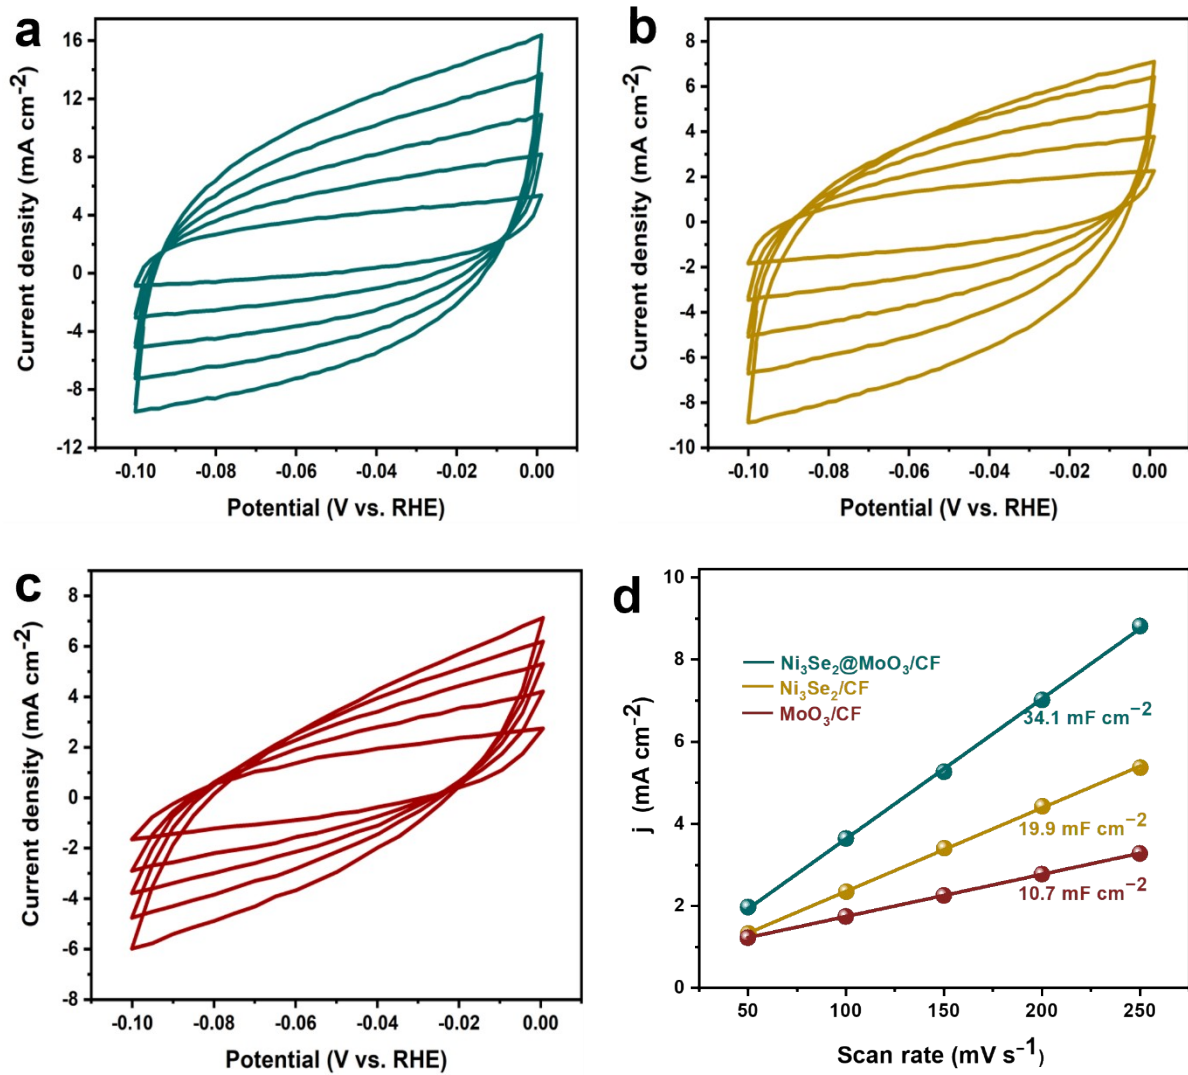

**Fig. S9.** (a-c) CVs recorded in a non-faraday region of different catalysts for HER. (d) The estimation of  $C_{dl}$ .

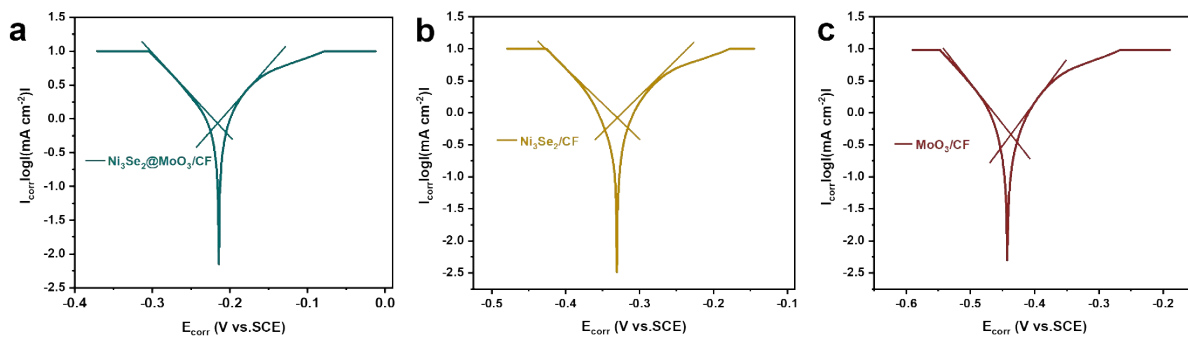

**Fig. S10.** (a-c) Corrosion polarization curves of the  $\text{Ni}_3\text{Se}_2@\text{MoO}_3/\text{CF}$ ,  $\text{Ni}_3\text{Se}_2/\text{CF}$ , and  $\text{MoO}_3/\text{CF}$  catalysts in 1.0 M KOH + seawater.

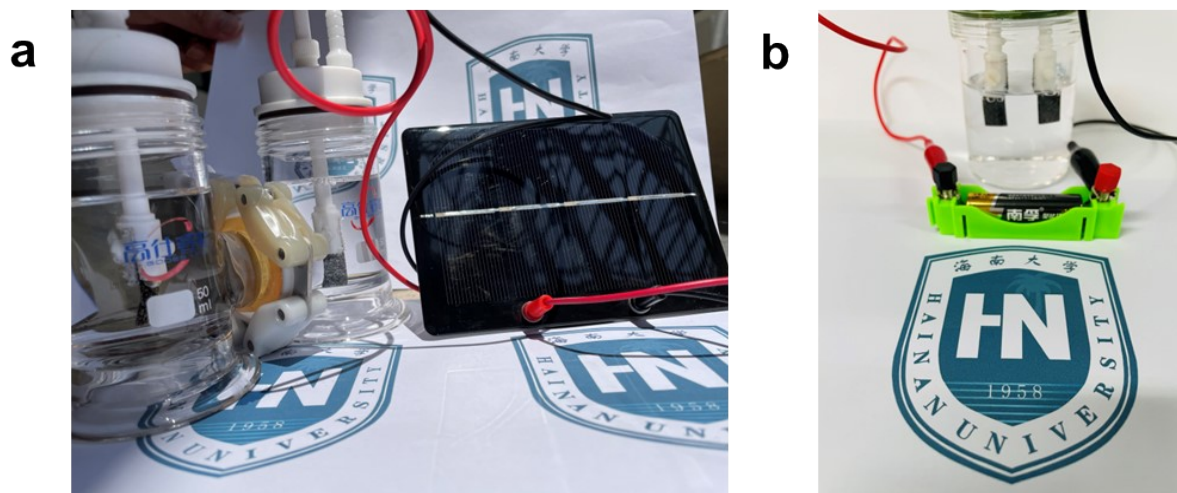

**Fig. S11.** (a) Photograph of solar cell driven seawater electrolysis. (b) Photograph showing the O<sub>2</sub> and H<sub>2</sub> bubbles produced from overall seawater splitting driven by a 1.5 V AA battery. Electrolyte: 1.0 M KOH + Seawater; temperature: 25 °C.

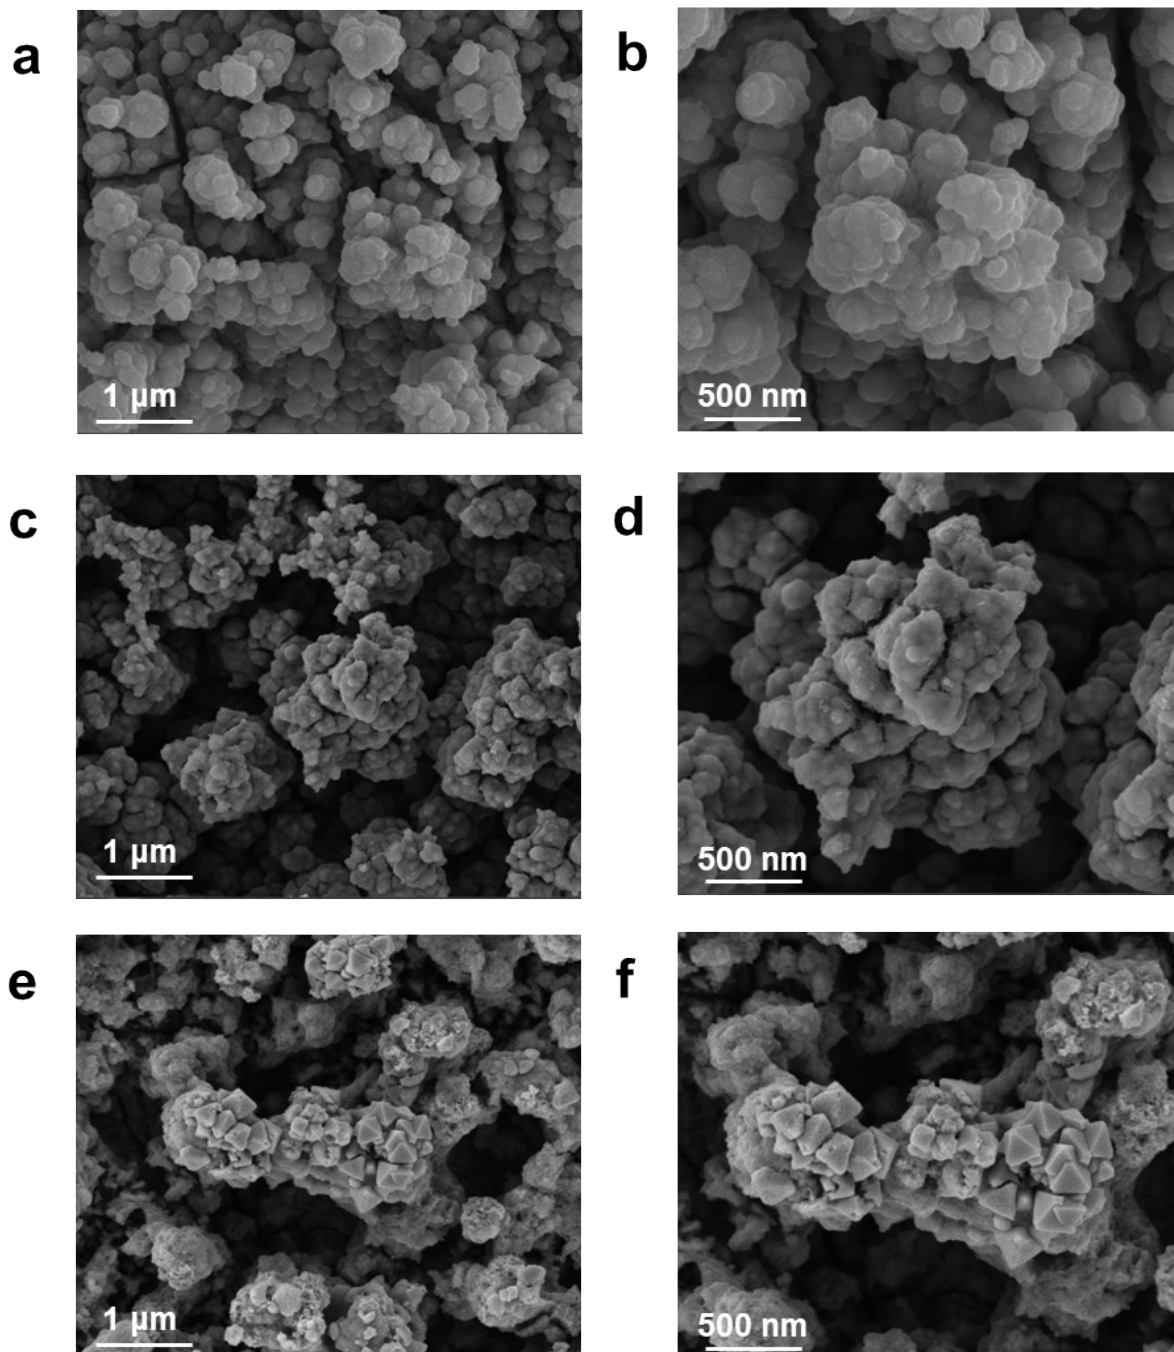

**Fig. S12.** The SEM images (a, b) initial and after 200 h v-t testing for (c, d) OER and (e, f) HER.



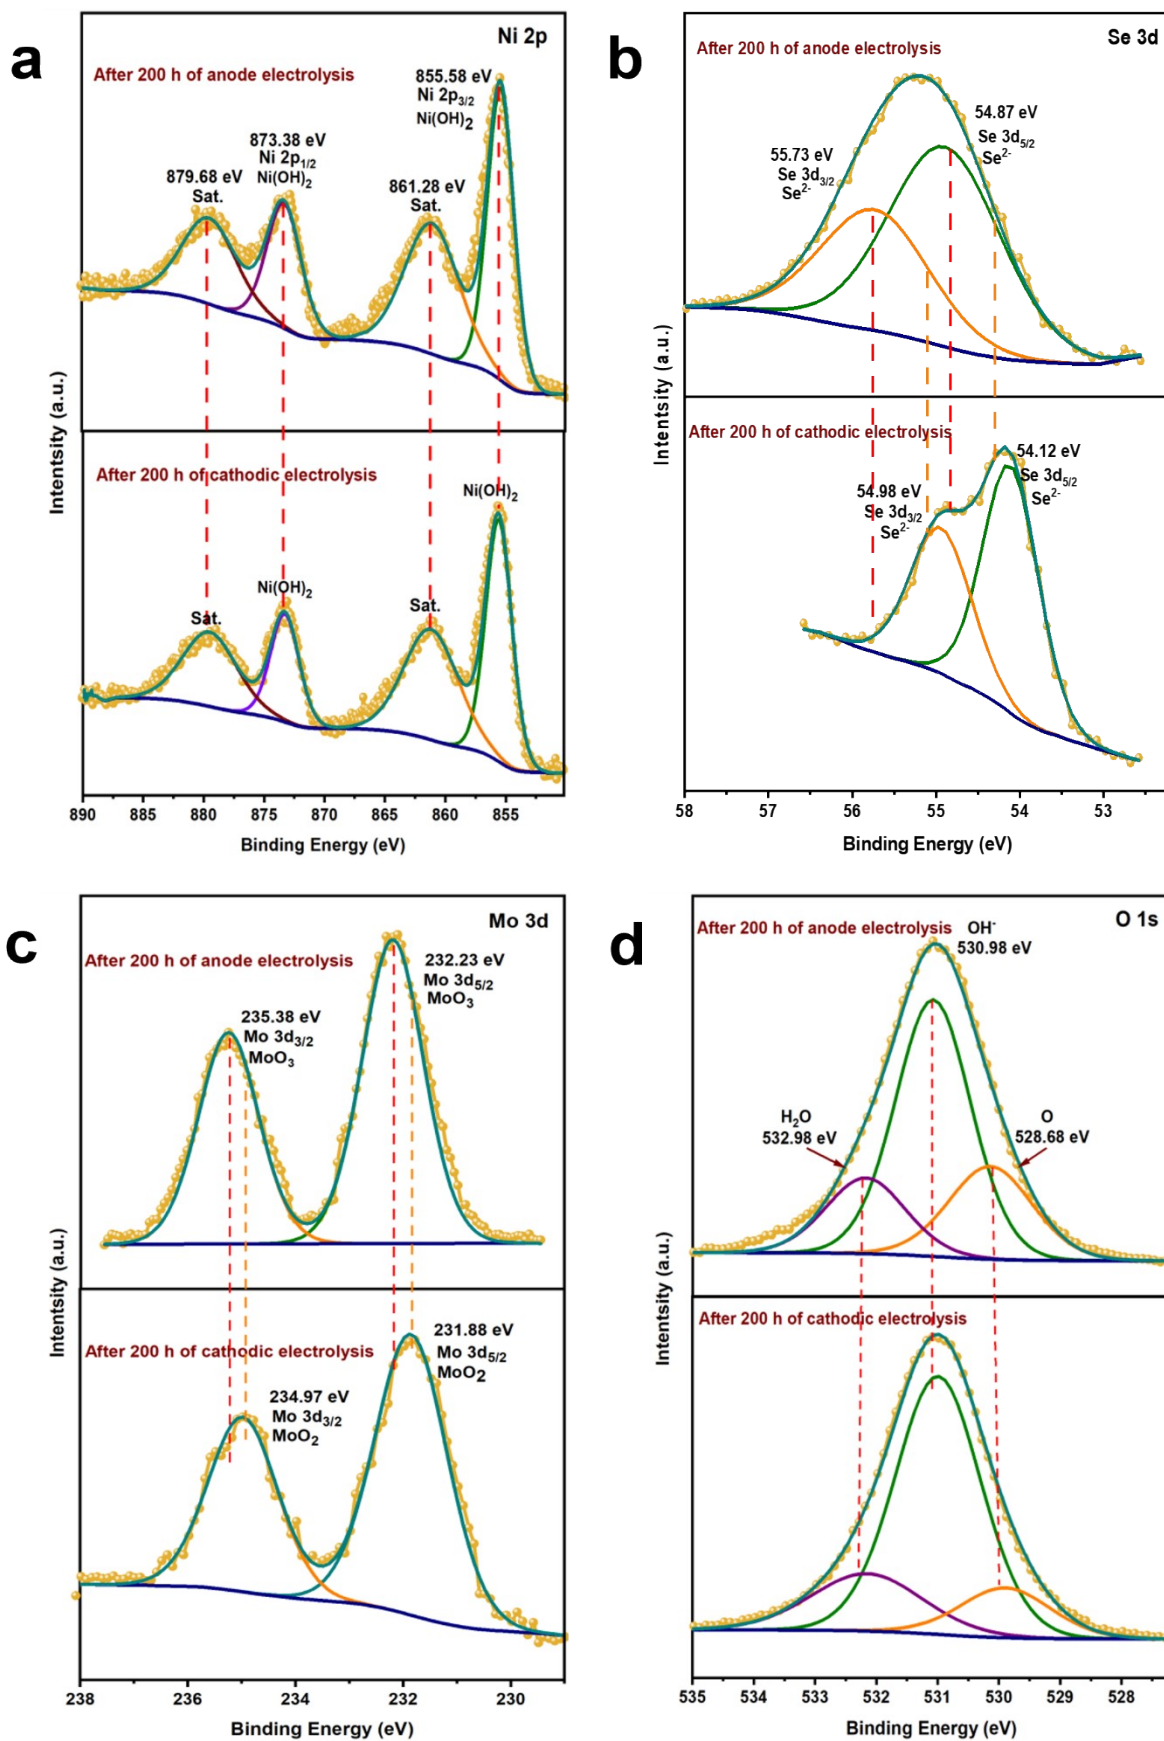

Fig. S13. XPS survey spectrum (a) Ni 2p, (b) Se 3d, (c) Mo 3d, and (d) O 1s after 200 h v-t testing.

**Table. S1.** OER activity, types of solutions, and potential of typical materials reported in the literature.

| OER Catalysts                                          | Solution                      | Potential(mV)<br>@100 mA cm <sup>-2</sup><br>@Stability (h) | Reference                                               |
|--------------------------------------------------------|-------------------------------|-------------------------------------------------------------|---------------------------------------------------------|
| <b>Ni<sub>3</sub>Se<sub>2</sub>@MoO<sub>3</sub>/CF</b> | <b>1.0 M KOH + 0.5 M NaCl</b> | <b>277 mV</b>                                               | <b>This work</b>                                        |
| <b>Ni<sub>3</sub>Se<sub>2</sub>@MoO<sub>3</sub>/CF</b> | <b>1.0 M KOH + Seawater</b>   | <b>280 mV@200h</b>                                          |                                                         |
| NiMoN@NiFeN                                            | 1.0 M KOH + 0.5 M NaCl        | 277 mV@100h                                                 | Nat. Commun., 2019, 10(1): 1-10.                        |
| S doped (Ni,Fe)OOH                                     | 1.0 M KOH + Seawater          | 300 mV@100h                                                 | Energy Environ. Sci, 2020, 13(10): 3439-3446.           |
| NiCoS/NF                                               | 1.0 M KOH + 0.5 M NaCl        | 270 mV@100h                                                 | Appl. Catal., B, 2021, 291: 120071.                     |
| Ni <sub>x</sub> Fe <sub>y</sub> N@C@NF                 | 1.0 M KOH + 0.5 M NaCl        | 270 mV@100h                                                 | J. Mater. Chem. A, 2021, 9(23): 13562-13569.            |
| Pt-Co <sub>3</sub> O <sub>4</sub> /CP                  | 1.0MNaOH + 3.5%NaCl           | 370 mV@20h                                                  | J. Mater. Chem. A, 2021, 9(10): 6316-6324.              |
| Fe <sub>2</sub> O <sub>3</sub> /NiO/NF                 | 1.0 M KOH + Seawater          | 339 mV@50h                                                  | ACS Appl. Mater. Interfaces, 2021, 13(31): 37152-37161. |
| Ni <sub>2</sub> P-Fe <sub>2</sub> P/NF                 | 1.0 M KOH + Seawater          | 305 mV@48h                                                  | Advanced Functional Materials, 2021, 31(1): 2006484.    |
| B-Co <sub>2</sub> Fe LDH                               | 1.0 M KOH + Seawater          | 310 mV@100h                                                 | Nano Energy, 2021, 83: 105838.                          |
| NiFe LDH/FeOOH                                         | 1.0 M KOH + 0.5 M NaCl        | 286.2 mV @105h                                              | Inorganic Chemistry, 2021, 60(22): 17371-17378.         |
| NiPS/NF                                                | 1.0 M KOH + Seawater          | 329 mV @60h                                                 | Journal of Energy Chemistry, 2022, 75: 66-73.           |
| Ni <sub>3</sub> B <sub>2</sub> S <sub>2</sub> @NF      | 1.0 M KOH + 0.5 M NaCl        | 390 mV @36h                                                 | Small, 2022, 18(12): 2106868.                           |
| 1D-Cu@Co-CoO/Rh                                        | 1.0 M KOH + 0.5 M NaCl        | 400 mV @12h                                                 | Small, 2021, 17(50): 2103826.                           |

**Table. S2.** Comparison of the performance of the Ni<sub>3</sub>Se<sub>2</sub>@MoO<sub>3</sub>/CF catalyst with some representative electrocatalysts reported recently for HER.

| Catalyst                                                                         | Overpotential<br>HER (mV)<br>@10 mA cm <sup>-2</sup><br>@stability | Electrolyte                                        | Reference                                      |
|----------------------------------------------------------------------------------|--------------------------------------------------------------------|----------------------------------------------------|------------------------------------------------|
| Ni <sub>3</sub> Se <sub>2</sub> @MoO <sub>3</sub> /CF                            | 242@100 mA cm <sup>-2</sup><br>120@10 mA cm <sup>-2</sup>          | 1.0 M KOH +<br>Seawater<br>1.0 M KOH +<br>Seawater | This work                                      |
| CoMnCH                                                                           | 180@10h                                                            | 1.0 M KOH                                          | J. Am. Chem. Soc., 139 (2017) 8320-8328.       |
| NGQDs-Ni <sub>3</sub> S <sub>2</sub>                                             | 218@16.7h                                                          | 1.0 M KOH                                          | Small, 13 (2017) 1700264.                      |
| NiCo <sub>2</sub> S <sub>4</sub>                                                 | 210@200h                                                           | 1.0 M KOH                                          | J. Mater. Chem. A, 4 (2016) 16394-16402.       |
| Ni/Ni <sub>x</sub> M <sub>y</sub>                                                | 130@24h                                                            | 1.0 M KOH                                          | Adv. Funct. Mater., 26 (2016) 3314-3323.       |
| Co@Co-P@CNTs                                                                     | 160                                                                | 1.0 M KOH                                          | Small, 10 (2014) 66-72.                        |
| Co-Se <sub>4</sub>                                                               | 268@100 mA cm <sup>-2</sup> @12h                                   | 1.0 M KOH                                          | Adv. Energy Mater., 8 (2018) 1801926.          |
| Ni <sub>3</sub> FeN-NPs                                                          | 320@100 mA cm <sup>-2</sup> @~9h                                   | 1.0 M KOH                                          | Adv. Energy Mater., 6 (2016) 1502585.          |
| 200-SMN/NF                                                                       | 287@100 mA cm <sup>-2</sup>                                        | 1.0 M KOH                                          | J. Mater. Chem. A, 5 (2017) 1595-1602.         |
| Ni-Co-P                                                                          | 156@20h                                                            | 1.0 M KOH                                          | J. Mater. Chem. A, 6 (2018) 12506-12514.       |
| Ni(OH) <sub>2</sub> /MoS <sub>2</sub>                                            | 290100 mA cm <sup>-2</sup>                                         | 1.0 M KOH                                          | Nano Energy, 37 (2017) 74-80.                  |
| Ni <sub>x</sub> Co <sub>3-x</sub> S <sub>4</sub> /Ni <sub>3</sub> S <sub>2</sub> | 258@100 mA cm <sup>-2</sup>                                        | 1.0 M KOH                                          | Nano Energy, 35 (2017) 161-170.                |
| Ni/NiP NPs                                                                       | 130@24h                                                            | 1.0 M KOH                                          | J. Am. Chem. Soc., 136 (2014) 7587-7590.       |
| CoP/CC                                                                           | 210@22h                                                            | 1.0 M KOH                                          | Int. J. Hydrogen Energy 41 (2016) 10688-10694. |
| Ni <sub>0.85</sub> Se/GS                                                         | 200@15h                                                            | 1.0 M KOH                                          | Electrochim. Acta., 365 (2021) 137384.         |
| Fe-Co-CN/rGO-700                                                                 | 215@45h                                                            | 1.0 M KOH                                          | ACS Catal., 9 (2019) 2956-2961.                |
| Fe <sub>0.5</sub> Co <sub>0.5</sub> P                                            | 143@12h                                                            | 1.0 M KOH                                          | J. Alloys Compd., 847 (2020) 156514.           |
| Ni <sub>1</sub> Co <sub>1</sub> -P                                               | 169@30h                                                            | 1.0 M KOH                                          | J. Mater. Chem. A, 9 (2021) 27639-27650.       |
| Ni <sub>3</sub> S <sub>2</sub> /Cu-NiCo                                          | 156@12h                                                            | 1.0 M KOH                                          |                                                |
| LDH/NF                                                                           |                                                                    |                                                    |                                                |

**Table. S3.** EIS simulating parameters of equivalent circuit element for OER.

| Type                                                  | $R_s$ ( $\Omega$ ) | $R_{ct}$ ( $\Omega$ ) | Chi squared          |
|-------------------------------------------------------|--------------------|-----------------------|----------------------|
| Ni <sub>3</sub> Se <sub>2</sub> @MoO <sub>3</sub> /CF | 0.52               | 4.5                   | $1.3 \times 10^{-4}$ |
| Ni <sub>3</sub> Se <sub>2</sub> /CF                   | 0.51               | 9.7                   | $2.4 \times 10^{-3}$ |
| MoO <sub>3</sub> /CF                                  | 0.53               | 13.4                  | $2.8 \times 10^{-4}$ |
| CF                                                    | 0.59               | 64.1                  | $3.9 \times 10^{-3}$ |

**Table. S4.** EIS simulating parameters of equivalent circuit element for HER.

| Type                                                  | $R_s$ ( $\Omega$ ) | $R_{ct}$ ( $\Omega$ ) | Chi squared          |
|-------------------------------------------------------|--------------------|-----------------------|----------------------|
| Ni <sub>3</sub> Se <sub>2</sub> @MoO <sub>3</sub> /CF | 0.53               | 1.9                   | $1.4 \times 10^{-4}$ |
| Ni <sub>3</sub> Se <sub>2</sub> /CF                   | 0.54               | 3.2                   | $2.9 \times 10^{-4}$ |
| MoO <sub>3</sub> /CF                                  | 0.51               | 12.4                  | $2.5 \times 10^{-3}$ |
| CF                                                    | 0.79               | 19.8                  | $5.1 \times 10^{-4}$ |

## Reference

- 1.X. Wang, J. Wang, B. Yu, W. Jiang, J. Wei, B. Chen, R. Xu and L. Yang, *J. Hazard. Mater.*, 2022, **428**, 128212.
- 2.S. Feng, J. Wang, W. Wang, X. Wang, Y. Zhang, A. Ju, J. Pan and R. Xu, *Adv. Mater. Interfaces*, 2021, **8**, 2100500.
- 3.X. Wang, J. Wang, W. Jiang, C. Chen, B. Yu and R. Xu, *Sep. Purif. Technol.*, 2021, **272**, 118916.
- 4.Z. Liu, X. Yu, H. Xue and L. Feng, *J. Mater. Chem. A*, 2019, **7**, 13242-13248.
